# Supplementary material
Source: publisher figshare collection journal article supplement (https://acs.figshare.com/ndownloader/files/26262082)
Supplement: Supplementary file 1 [file 26262082]

# Lanthanide Supramolecular Transformers Induced by K<sup>+</sup> and CO<sub>2</sub>

Bei Wang,<sup>★,§,\*</sup> Bing Ma,<sup>★,#</sup> Zhangwen Wei,<sup>※</sup> Huan Yang,<sup>§</sup> Meng Wang,<sup>◇</sup> Wenxia Yin,<sup>◇</sup> Hong Gao,<sup>§</sup> and Weisheng Liu<sup>\*,§</sup>

<sup>§</sup>Key Laboratory of Nonferrous Metals Chemistry and Resources Utilization of Gansu Province, State Key Laboratory of Applied Organic Chemistry, and College of Chemistry and Chemical Engineering, Lanzhou University, Lanzhou 730000, China

<sup>#</sup>Department of Orthopedics, Lanzhou University Second Hospital, Lanzhou 730000, China

<sup>※</sup>MOE Laboratory of Bioinorganic and Synthetic Chemistry/KLGHEI of Environment and Energy Chemistry, Lehn Institute of Functional Materials, School of Chemistry and Chemical Engineering, Sun Yat-Sen University, Guangzhou 510275, China

<sup>◇</sup>Biochemistry Teaching and Research Section, Gangou Middle School of Jingning, Pingliang 743400, China

<sup>★</sup>These authors contributed equally.

## Supporting Information

### Experimental Section

#### General Materials and Methods.

The 3-methoxysalicylaldehyde and 3-ethoxysalicylaldehyde were purchased from Alfa Aesar and used without further purification. All solvents and other reagents were reagent grade quality. Elemental analyses were tested by an Elementar Vario El instrument. HRESI-MS were performed on Fourier Transform Ion Cyclotron Resonance Mass Spectrometer, Bruker Apex IV FTMS and Agilent 6210 ESI/TOF mass spectrometer. IR spectra were recorded on a Nicolet Avatar 360 FT-IR instrument. <sup>1</sup>H NMR (400 MHz) and <sup>1</sup>H NMR (600 MHz) were recorded on a JNM-ECS 400M NMR spectrometer and a Varian Mercury Plus 400 respectively. Solid-state <sup>13</sup>C NMR spectra were performed on a Bruker AV400 spectrometer.

#### Ligand Synthesis.

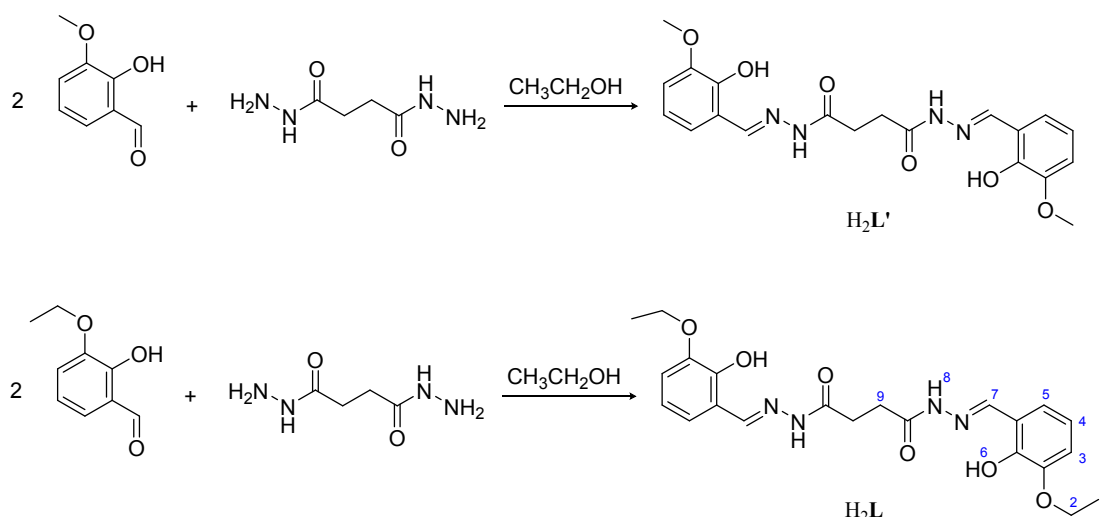

**Scheme S1.** Synthesis of  $H_2L'$  and  $H_2L$

#### Butanedihydrazide-bridged bis(3-ethoxysalicylaldehyde) ligand ( $H_2L$ )

Butanedihydrazide (1.46 g, 0.010 mol) was added to a 20 mL refluxing ethanol solution of 3-ethoxysalicylaldehyde (4.15 g, 0.025 mmol). The mixture was refluxed for 4 hours and the precipitate was filtered off and washed several times with ethanol and then dried over vacuum to get pure  $H_2L$  as a white solid (3.54 g, 80 %). M.p.: 247-249 °C.  $^1H$  NMR (400 MHz, DMSO- $d_6$ , ppm):  $\delta$  11.69 (d, 1H,  $J$  = 10.8 Hz,  $H^6$ ), 11.30 (d, 1H,  $J$  = 4.4 Hz,  $H^6$ ), 10.89 (d, 1H,  $J$  = 18 Hz,  $H^8$ ), 9.46 (d, 1H,  $J$  = 15.6 Hz,  $H^8$ ), 8.35(s, 1H,  $H^7$ ), 8.30(s, 1H,  $H^7$ ), 6.77-7.22 (m, 6H, Ph-H), 4.02-4.08 (m, 4H,  $H^2$ ), 2.91 (m, 2H,  $H^9$ ), 2.56 (m, 2H,  $H^9$ ), 1.34 (m, 6H,  $H^1$ ).  $^{13}C$  NMR (100 MHz, Solid-state, ppm),  $\delta$  175.42(CO), 148.10(CO, CN), 123.92(CH), 121.04(CH), 117.71(C), 112.16(CH), 62.55( $CH_2$ ), 26.74( $CH_2$ ), 16.74( $CH_3$ ); ESI-MS:  $m/z$  443.2  $[M + H]^+$ . (We reported this ligand in our early work *Angew. Chem. Int. Ed.* **2013**, 52, 3756-3759.)

#### Butanedihydrazide-bridged bis(3-methoxysalicylaldehyde) ligand ( $H_2L'$ )

The preparation of the ligands  $H_2L'$  is as same as the procedure of  $H_2L$  (see Scheme S1). M.p.: 248.7 – 249.9 °C.  $^1H$  NMR (400 MHz, DMSO- $d_6$ , ppm):  $\delta$  11.69 (d, 1H, OH), 11.30 (d, 1H, OH), 10.89 (d, 1H, NH), 9.52 (d, 1H, NH), 8.35(s, 1H, NCH), 8.30(s, 1H, NCH), 6.78 – 7.27 (m, 6H, Ar), 2.91 (m, 2H,  $CH_2CO$ ), 3.81 (s, 3H,  $CH_3$ ), 3.79 (s, 3H,  $CH_3$ ), 2.56 (m, 2H,  $CH_2CO$ ). ESI-MS:  $m/z$  413.5  $[M - H]^+$ .

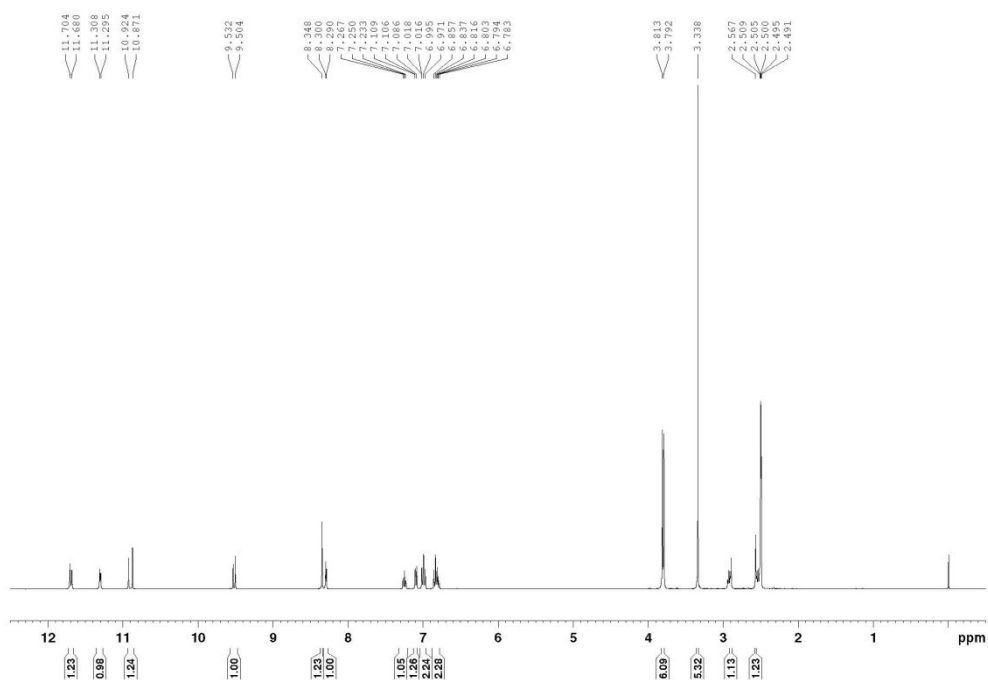

**Figure S1.**  $^1\text{H}$  NMR (400 MHz) spectrum of  $\text{H}_2\text{L}'$  in  $[\text{D}_6]$  DMSO.

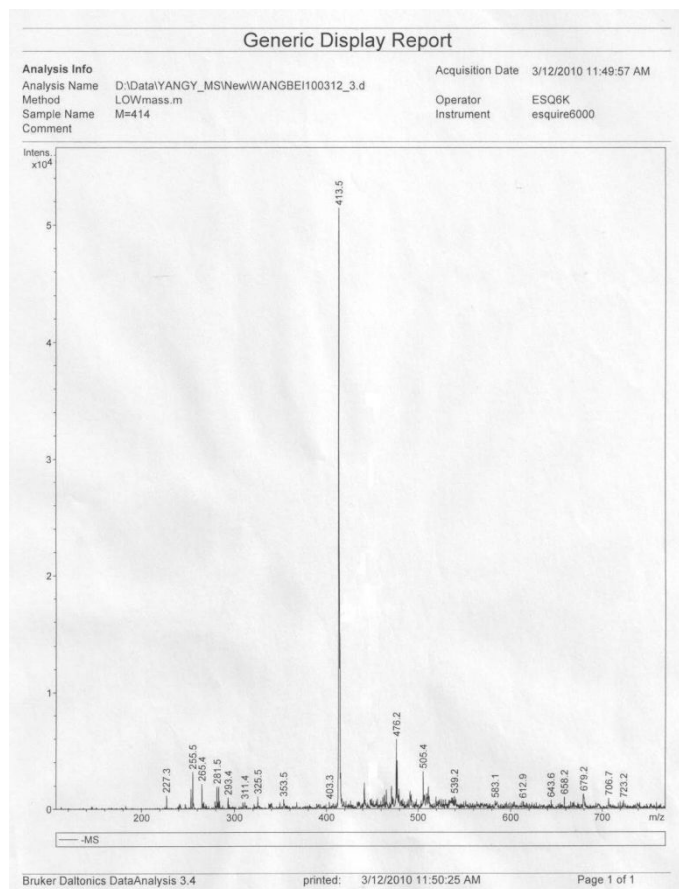

**Figure S2.** ESI-MS spectrum of  $\text{H}_2\text{L}'$

### Synthesis of complex 3.

2 mL methanol containing 0.1 mmol  $\text{CeCl}_3 \cdot 7\text{H}_2\text{O}$  (37.3 mg) was added in batches to a stirred 5 mL DMF of 0.1 mmol  $\text{H}_2\text{L}'$  (41.4 mg). The mixture was stirred in air for 4h at room temperature, then a black solution was formed. The solution was filtered and kept in air then. Black block single crystals of  $\text{Ce}_2\text{L}'_3$  which are suitable for X-ray crystallography were obtained on slow evaporation over 1 month. Elemental analysis calcd (%) for **3**  $\text{C}_{60}\text{H}_{60}\text{Ce}_2\text{Cl}_2\text{N}_{12}\text{O}_{18}$  (non-coordinated solvent molecules were lost upon drying process): C, 45.39; H, 3.78; N, 10.59. Found: C, 45.40; H, 3.75; N, 10.58. High-resolution electrospray ionization mass spectrometry (HRESI-MS):  $m/z = 758.1103$  [ $\text{Ce}_2\text{L}'_3$ ] $^{2+}$  (calcd for  $\text{C}_{60}\text{H}_{60}\text{N}_{12}\text{O}_{18}\text{Ce}_2$ , 758.1129), FT-IR (KBr pellet) ( $\text{cm}^{-1}$ ): 3440.0(br), 1600.0(vs), 1557.5(m), 1442.9(s), 1396.0(m), 1365.5(w), 1292.7(s), 1248.4(s), 1073.3(w), 854.9(w), 739.9(m), 567.3(w) (Figure S5).

### Synthesis of complexes 4a and 4b.

A solution of 0.1 mmol rare earth halide salt in 2 mL methanol was added into a light yellow and transparent solution of  $\text{H}_2\text{L}$  (44.2 mg, 0.1 mmol) with KOH (5.6 mg, 0.2 mmol) after mixing in 8 mL methanol along with 0.5 mL DMF. Tetranuclear dimetallic triple-stranded helicates,  $[\text{K}_2\text{La}_2\text{L}_3(\text{H}_2\text{O})_2]\text{Br}_2$  (**4a**) and  $[\text{K}_2\text{Nd}_2\text{L}_3(\text{DMF})_2]\text{Cl}_2$  (**4b**) were formed by evaporation in air at room temperature over 4 weeks (yield: 50%). Elemental analysis calcd (%) for **4a**  $\text{C}_{66}\text{H}_{76}\text{Br}_2\text{K}_2\text{La}_2\text{N}_{12}\text{O}_{20}$  (non-coordinated solvent molecules were lost upon evaporation): C, 42.28; H, 4.06; N, 8.97. Found: C, 42.31; H, 4.01; N, 8.88. High-resolution electrospray ionization mass spectrometry (HRESI-MS):  $m/z = 856.1344$  [ $\text{K}_2\text{La}_2\text{L}_3(\text{H}_2\text{O})_2$ ] $^{2+}$  (calcd for [ $\text{C}_{66}\text{H}_{72}\text{K}_2\text{La}_2\text{N}_{12}\text{O}_{18}$ ] $^{2+}$ , 856.1350); Elemental analysis calcd (%) for **4b**  $\text{C}_{72}\text{H}_{86}\text{Cl}_2\text{K}_2\text{Nd}_2\text{N}_{14}\text{O}_{20}$  (noncoordinated solvent molecules were lost upon drying): C, 45.47; H, 4.53; N, 10.31. Found: C, 45.31; H, 4.41; N, 10.28. High-resolution electrospray ionization mass spectrometry (HRESI-MS):  $m/z = 843.1322$  [ $\text{K}_2\text{Nd}_2\text{L}_3$ ] $^{2+}$  (calcd for [ $\text{C}_{66}\text{H}_{72}\text{K}_2\text{Nd}_2\text{N}_{12}\text{O}_{18}$ ] $^{2+}$ , 843.1285); FT-IR for **4a** and **4b** (KBr pellet) ( $\text{cm}^{-1}$ ): 3428.11 (br), 2958.88 (br), 1603.67 (vs), 1453.10 (s), 1395.30(m), 1365.64 (m), 1310.15 (m), 1220.38 (s), 1175.51 (w), 1068.28(m), 1017.33(w), 972.46(w), 888.05(w), 850.5(w), 741.27(s), 656.86(w), 566.36(w) (Figure S9).

### Synthesis of complexes 5a and 5b.

0.2 mmol  $\text{LiOH} \cdot \text{H}_2\text{O}$  or 0.2 mmol NaOH and 0.1 mmol  $\text{H}_2\text{L}$  (44.2 mg) were added into a mixing solvent containing 8 mL methanol and 0.5 mL DMF, and then the solution was stirred for 10 min. After that, a solution of 0.1 mmol  $\text{LnCl}_3 \cdot 6\text{H}_2\text{O}$  in 2 mL methanol was added. The mixture was rapidly stirred for 10 min. Then the solution was filtered and kept in air. Rhombohedral crystals of  $[\text{La}_4\text{L}_4(\text{CO}_3)]\text{Cl}_2$  (**5a**) and  $[\text{Nd}_4\text{L}_4(\text{CO}_3)]\text{Cl}_2$  (**5b**) suitable for X-ray analysis were obtained by slow evaporation over several weeks at room temperature in air (yield: 60%).  $\text{CO}_2$  molecules from air are efficiently captured and fixed by these clusters. Elemental analysis calcd (%) for **5a**  $\text{C}_{89}\text{H}_{96}\text{Cl}_2\text{La}_4\text{N}_{16}\text{O}_{27}$  (non-coordinated solvent molecules were lost upon drying process): C, 44.94; H, 4.04; N, 9.43. Found: C, 44.71; H, 4.01;

N, 9.21. HRESI-MS:  $m/z = 1188.14244$   $[\text{La}_4\text{L}_4(\text{CO}_3)]^{2+}$  (calcd for  $[\text{C}_{89}\text{H}_{96}\text{La}_4\text{N}_{16}\text{O}_{27}]^{2+}$ , 1188.14369); Elemental analysis calcd (%) for **5b**  $\text{C}_{89}\text{H}_{96}\text{Cl}_2\text{Nd}_4\text{N}_{16}\text{O}_{27}$  (non-coordinated solvent molecules were lost upon drying): C, 43.34; H, 3.90; N, 9.09. Found: C, 43.61; H, 3.98; N, 9.13. HRESI-MS:  $m/z = 1197.1517$   $[\text{Nd}_4\text{L}_4(\text{CO}_3)]^{2+}$  (calcd for  $[\text{C}_{89}\text{H}_{96}\text{Nd}_4\text{N}_{16}\text{O}_{27}]^{2+}$ , 1197.1509); FT-IR for **5a** and **5b** (KBr pellet) ( $\text{cm}^{-1}$ ): 3402.00(br), 3180.44(br), 2974.75(br), 1642.97(vs), 1610.00(vs), 1552.44(m), 1500.00(w), 1450.00(s), 1392.02(m), 1308.63(w), 1218.10(s), 1070.39(m), 973.50(w), 883.77(w), 844.85(w), 742.40(w), 651.87(w), 562.13(w) (Figure S25).

*Caution:* There were no problems involved during the preparation of rare earth halide salts and hydrazine hydrate, but suitable care should be taken when handling such potentially hazardous compounds.

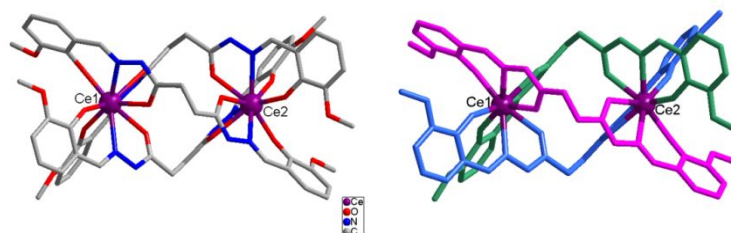

**Figure S3.** Frame-and-sphere representations of the crystal structure of **3**. For clarity, each ligand is represented in a different color, with cerium ions represented by purple spheres. Hydrogen atoms, external counteranions, and solvent molecules are omitted for clarity.

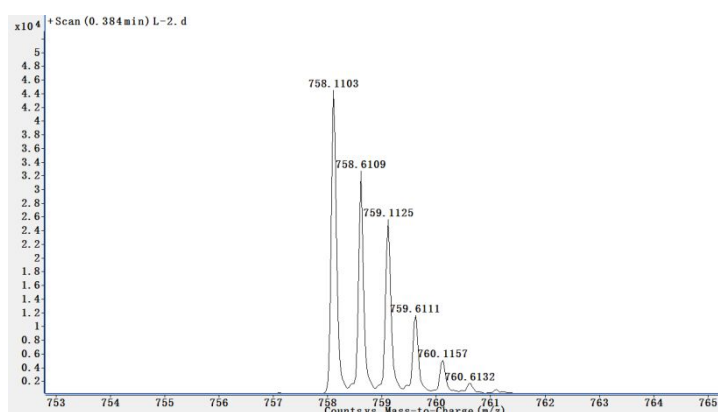

**Figure S4.** HRESI-MS spectrum of **3**.

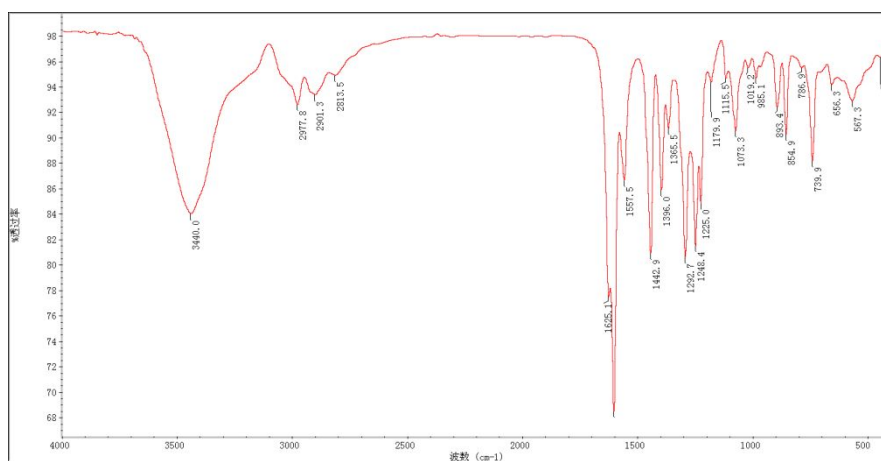

**Figure S5.** IR spectra of complex **3** in the solid state (KBr disk) at room temperature.

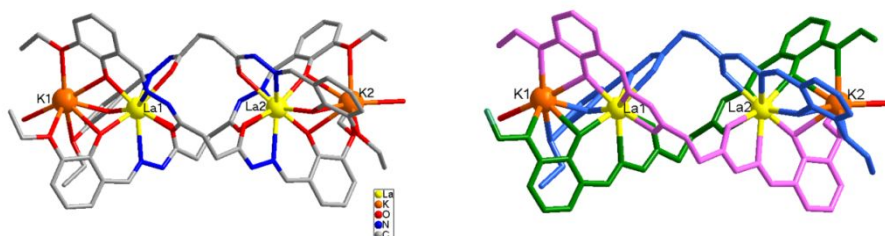

**Figure S6.** Frame-and-sphere representations of the crystal structure of **4a**. For clarity, each ligand is represented in a different color, with lanthanum ions represented by yellow spheres, potassium ions represented by orange spheres, coordinated H<sub>2</sub>O red. Hydrogen atoms, external counteranions, and solvent molecules are omitted for clarity.

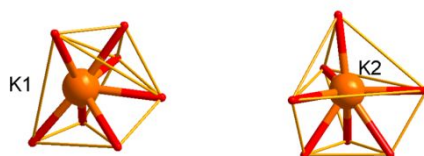

**Figure S7.** Coordination polyhedrons of the potassium ions in **4a**.

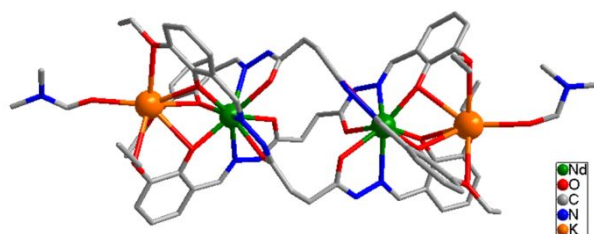

**Figure S8.** Frame-and-sphere representations of the crystal structure of **4b**. Hydrogen atoms, external counteranions, and solvent molecules are omitted for clarity.

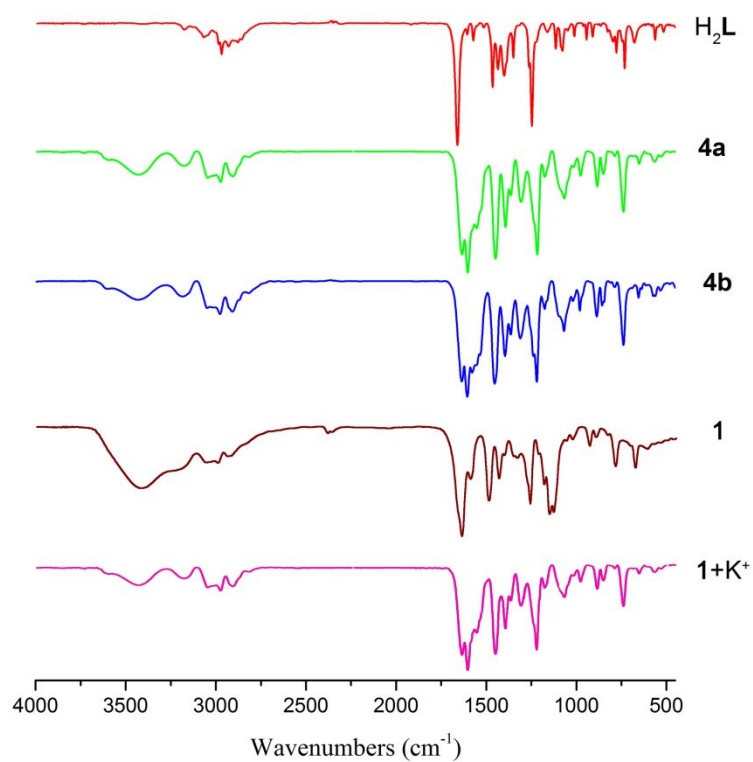

**Figure S9.** IR spectra of ligand  $\text{H}_2\text{L}$  and complexes (**4a**, **4b**, **1**,  $1+\text{K}^+$ ) in the solid state (KBr disk) at room temperature.

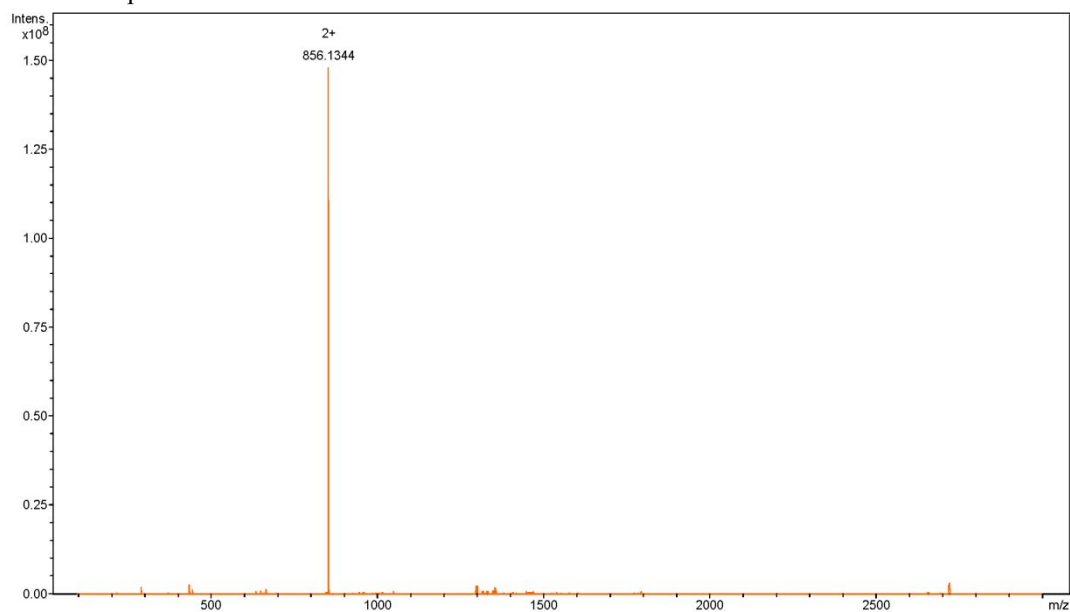

**Figure S10.** HRESI-MS spectrum of **4a**.

## Mass Spectrum List Report

### Analysis Info

Analysis Name D:\Data\HYY\method\_000552.d  
 Method 4\_19\_MassAccuNeg  
 Sample Name 1  
 Comment

Acquisition Date 11/3/2015 2:46:03 PM

Operator  
 Instrument solariX

### Acquisition Parameter

|                          |            |                   |     |                       |                          |
|--------------------------|------------|-------------------|-----|-----------------------|--------------------------|
| Polarity                 | Positive   | n/a               | n/a | No. of Laser Shots    | 200                      |
| n/a                      | n/a        | No. of Cell Fills | 1   | Laser Power           | 20.0 lp                  |
| Broadband Low Mass       | 53.8 m/z   | n/a               | n/a | n/a                   | n/a                      |
| Broadband High Mass      | 3000.0 m/z | n/a               | n/a | n/a                   | n/a                      |
| Acquisition Mode         | Single MS  | n/a               | n/a | Calibration Date      | Fri Feb 21 02:36:54 2014 |
| Pulse Program            | basic      | n/a               | n/a | Data Acquisition Size | 1048576                  |
| Source Accumulation      | 0.010 sec  | n/a               | n/a | Apodization           | Sine-Bell Multiplication |
| Ion Accumulation Time    | 0.200 sec  | n/a               | n/a | Apodization           | Apodization              |
| Flight Time to Acq. Cell | 0.001 sec  | n/a               | n/a |                       |                          |

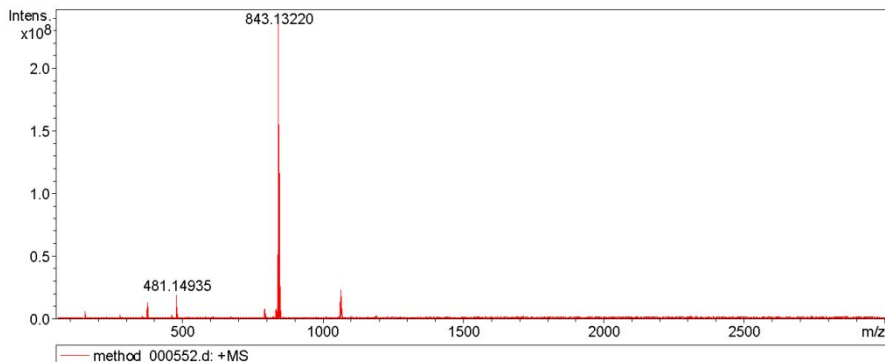

**Figure S11.** High-resolution electrospray ionization mass spectra (HRESI-MS) of the compound **4b**.

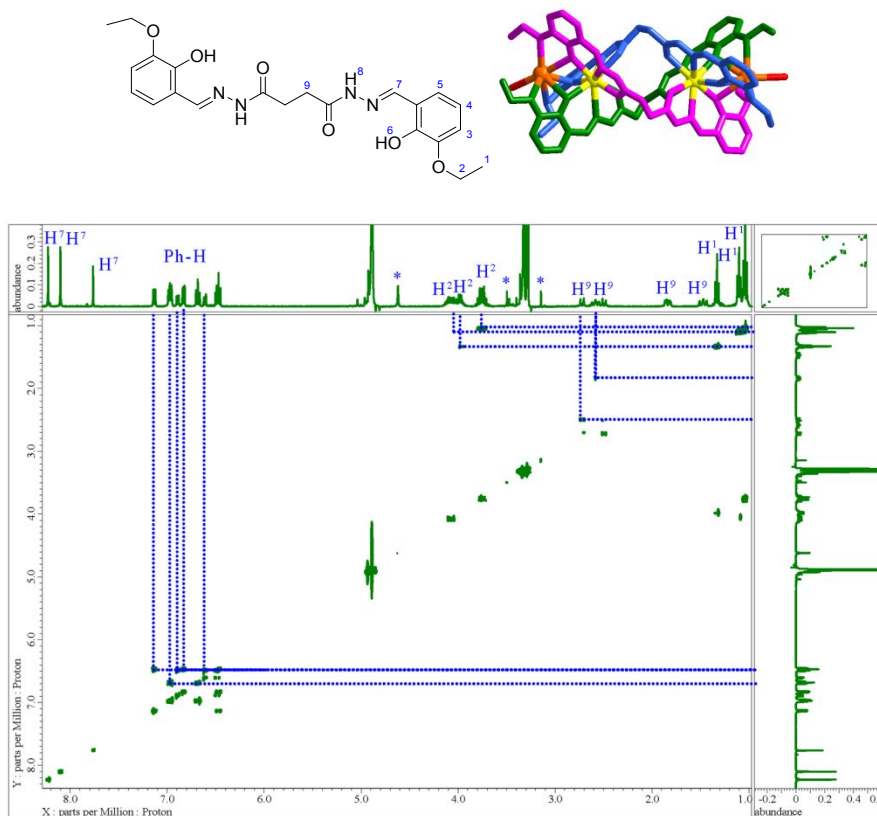

**Figure S12.**  $^1\text{H}/^1\text{H}$  COSY (400 MHz) of **4a** in  $\text{CD}_3\text{OD}$ .



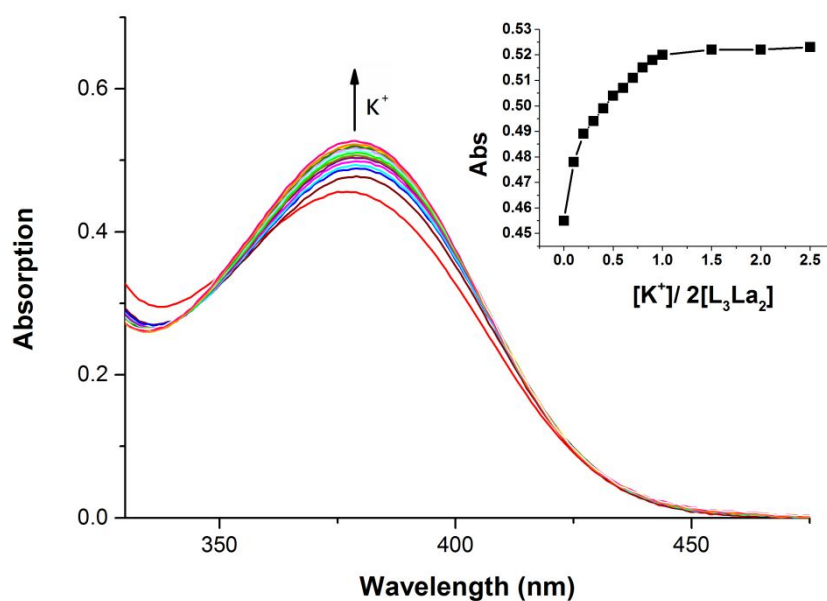

**Figure S13.** UV-Vis spectral of compound  $[L_3La_2]$  upon addition of  $K^+$  in acetonitrile at room temperature.  $[L_3La_2] = 1.67 \times 10^{-5}$  M,  $[KBr] = 0, 0.1, 0.2, 0.3, 0.4, 0.5, 0.6, 0.7, 0.8, 0.9, 1.0, 1.5, 2.0, 2.5, 3.0$  equivalents,  $T = 25$  °C. The synthesis of compound  $[L_3La_2]$ : A mixture of  $H_2L$  and  $LaBr_3 \cdot 7H_2O$  ( $H_2L$  and  $LaBr_3$  in a 3:2 ratio) in DMF was rapid stirred under a  $N_2$  atmosphere.

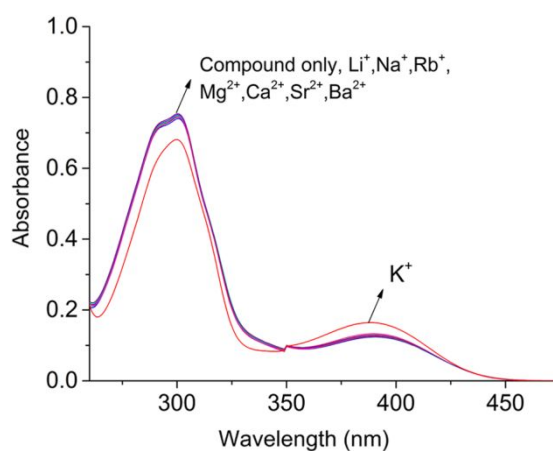

**Figure S14.** The absorption spectra of the compound  $[L_3La_2]$  in the presence of 2 equiv different ions such as  $Li^+$ ,  $Na^+$ ,  $K^+$ ,  $Rb^+$ ,  $Mg^{2+}$ ,  $Ca^{2+}$ ,  $Sr^{2+}$ , and  $Ba^{2+}$  (all the ions as their  $Cl^-$  salts) in methanol. Experimental conditions:  $[L_3La_2] = 0.667 \times 10^{-5}$  M,  $T = 25$  °C. The synthesis of compound  $[L_3La_2]$ : A mixture of  $H_2L$  and  $LaBr_3 \cdot 7H_2O$  ( $H_2L$  and  $LaBr_3$  in a 3:2 ratio) in DMF was rapid stirred under a  $N_2$  atmosphere.

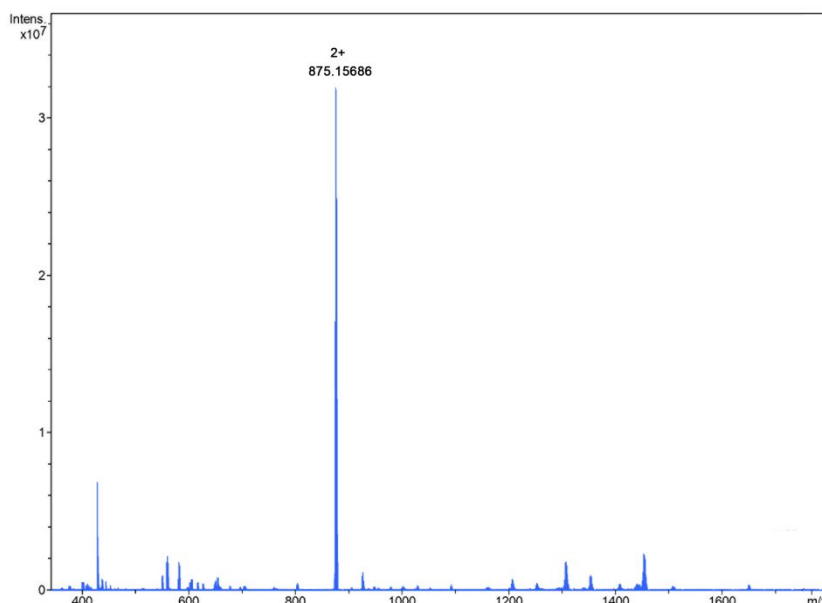

**Figure S15.** High-resolution electrospray ionization mass spectra (HRESI-MS) of the compound  $[L_3Nd_2]$  upon addition of 2 equiv different ions such as  $Li^+$ ,  $Na^+$ ,  $K^+$ ,  $Rb^+$ ,  $Mg^{2+}$ ,  $Ca^{2+}$ ,  $Sr^{2+}$ , and  $Ba^{2+}$  (all the ions as their  $Cl^-$  salts) in DMF- $CH_3OH$  solution. The main peak was observed at  $m/z = 875.15686$ , which represented the complex  $[L_3Nd_2K_2(CH_3OH)_2]^{2+}$ . The synthesis of compound  $[L_3Nd_2]$ : A mixture of  $H_2L$  and  $NdCl_3 \cdot 7H_2O$  ( $H_2L$  and  $NdCl_3$  in a 3:2 ratio) in DMF was rapid stirred under a  $N_2$  atmosphere.

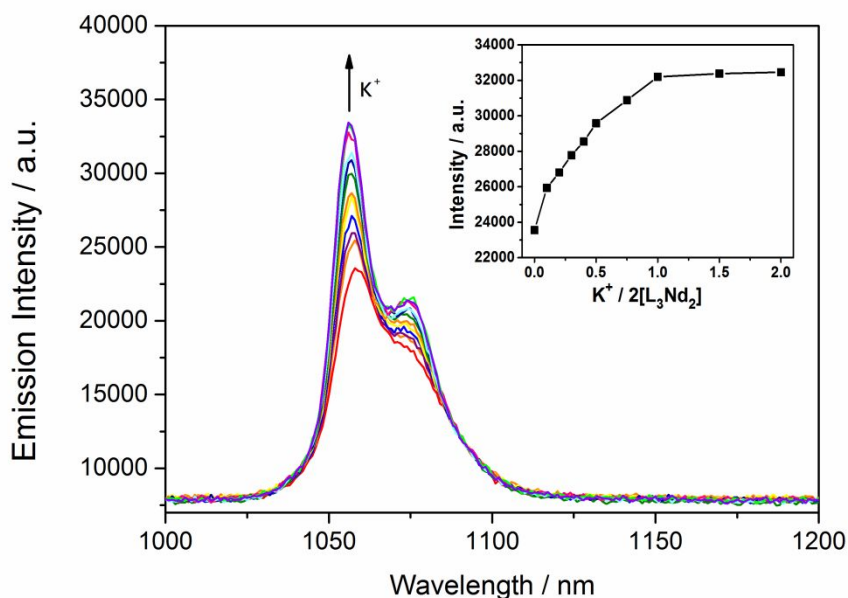

**Figure S16.** The NIR emission spectra change of  $[L_3Nd_2]$  upon addition of  $K^+$  in acetonitrile ( $[L_3Nd_2] = 1.67 \times 10^{-5} M$ ,  $[KCl] = 0, 0.1, 0.2, 0.3, 0.4, 0.5, 0.6, 0.7, 0.8, 0.9, 1.0, 1.5, 2.0, 2.5, 3.0$  equivalents). Inset: the emission intensity of  $[L_3Nd_2]$  at 1058 nm as a function of  $K^+/2[L_3Nd_2]$ .  $\lambda_{ex}=383$  nm. The synthesis of compound  $[L_3Nd_2]$ : A mixture of  $H_2L$  and  $NdCl_3 \cdot 7H_2O$  ( $H_2L$  and  $NdCl_3$  in a 3:2 ratio) in DMF was rapid stirred under a  $N_2$  atmosphere.

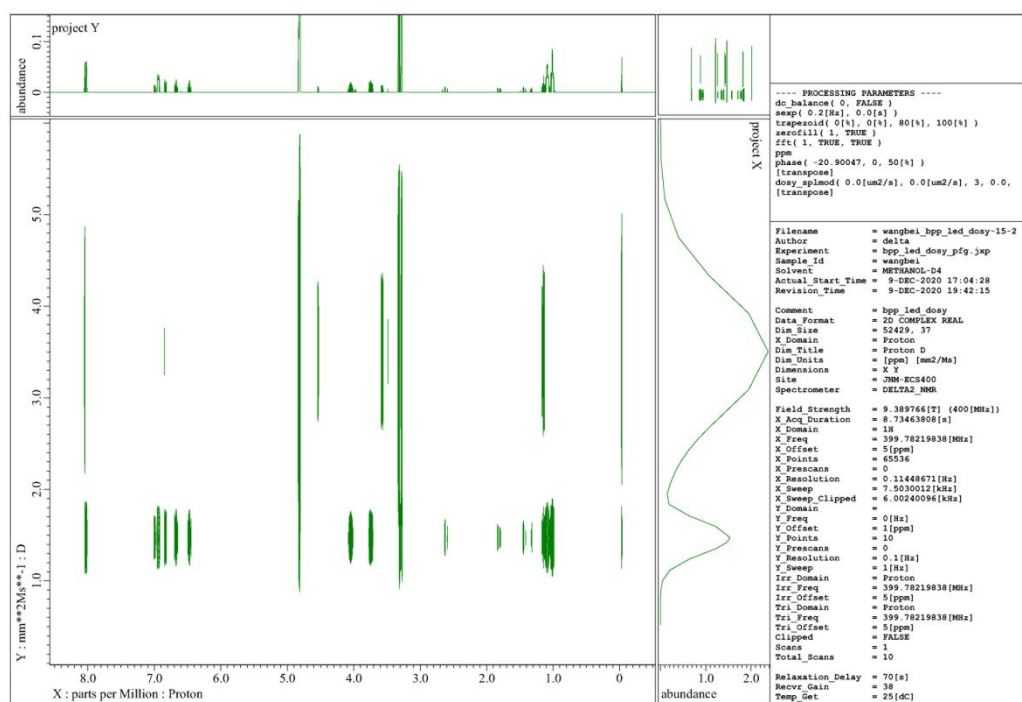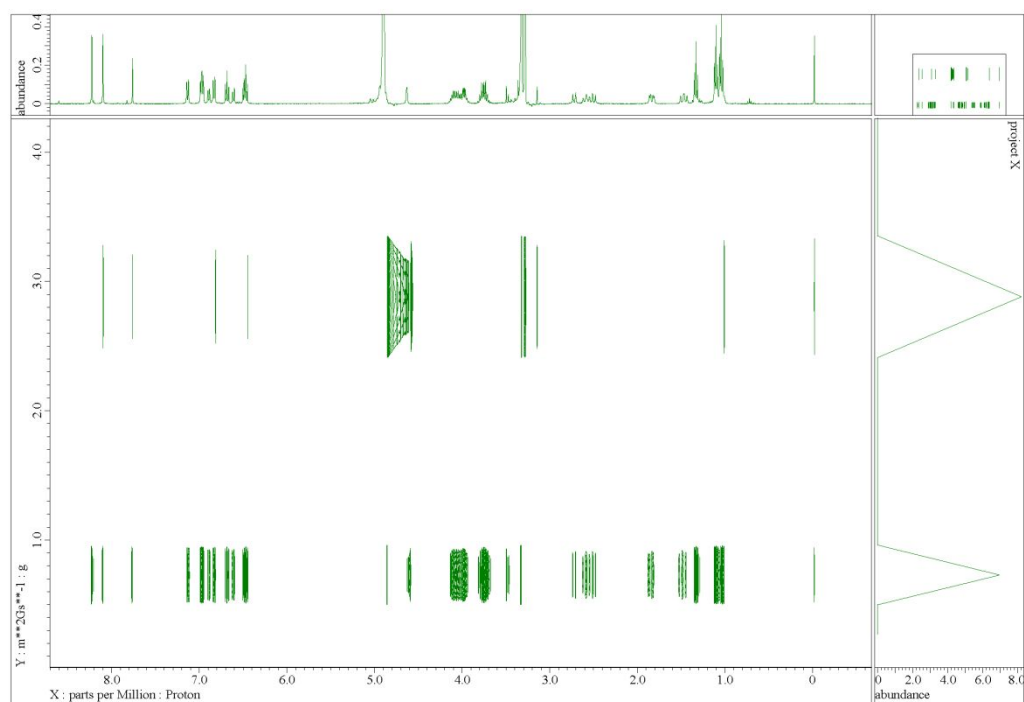

**Figure S17.** <sup>1</sup>H DOSY spectrum of complex **1** (top) and complex **1** with all kinds of alkali and earth-alkali metal chloride (bottom, logD=-9.106). 400 MHz, CD<sub>3</sub>OD, 298K.

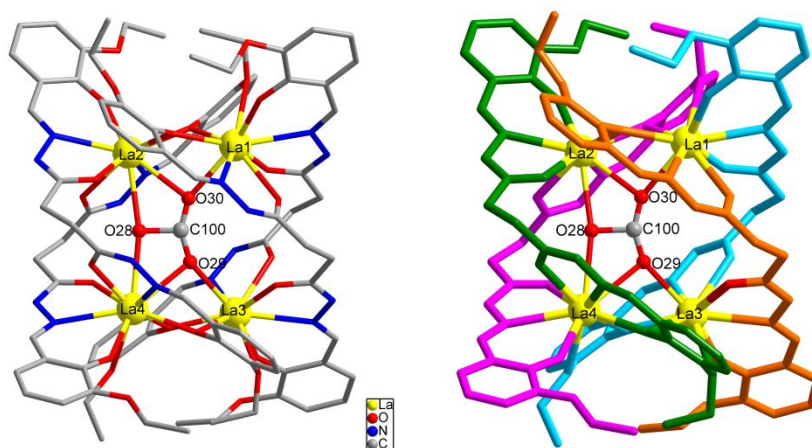

**Figure S18.** Frame-and-sphere representations of the crystal structure of **5a**. For clarity, each ligand is represented in a different color, with lanthanum ions represented by yellow spheres. Hydrogen atoms, external counteranions, and solvent molecules are omitted for clarity.

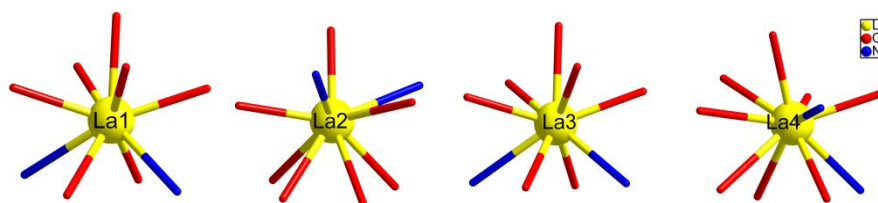

**Figure S19.** Coordination polyhedrons of the lanthanum ions in **5a**.

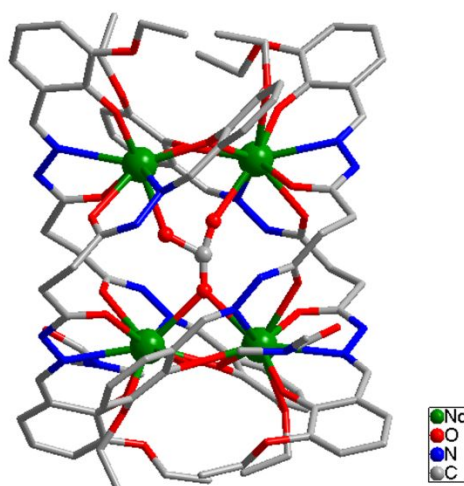

**Figure S20.** Frame-and-sphere representations of the crystal structure of **5b**. Hydrogen atoms, external counteranions, and solvent molecules are omitted for clarity.

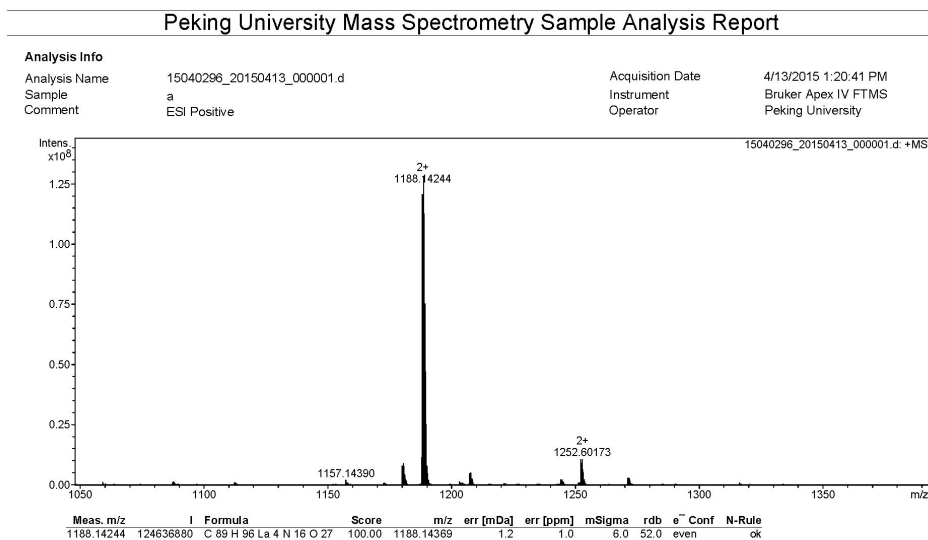

**Figure S21.** High-resolution electrospray ionization mass spectra (HRESI-MS) of the compound **5a**.

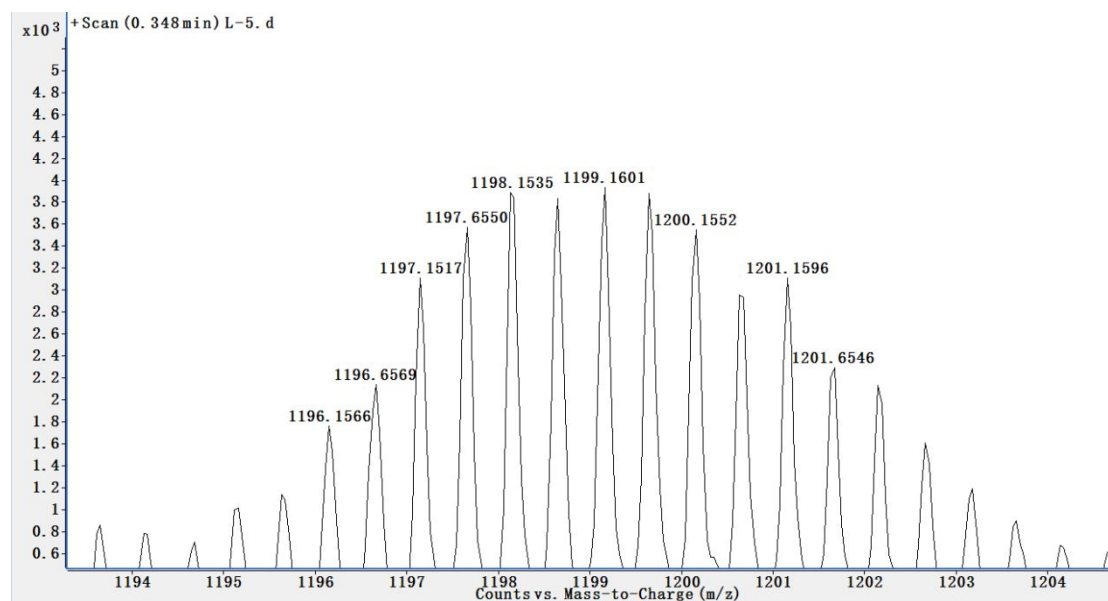

**Figure S22.** HRESI-MS spectrum of **5b**.

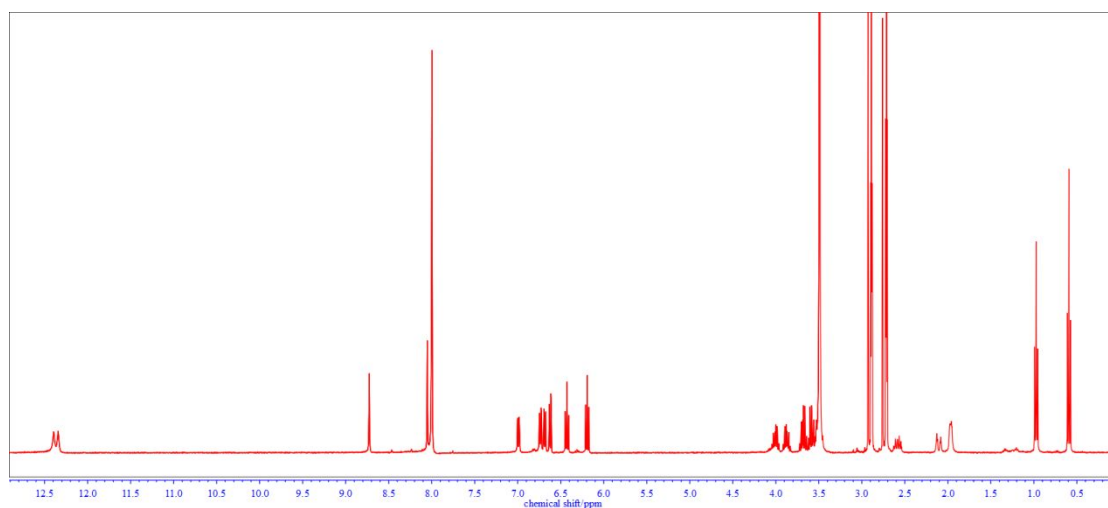

**Figure S23.**  $^1\text{H}$  NMR (400 MHz) of **5a** in  $\text{DMF-d}^7$

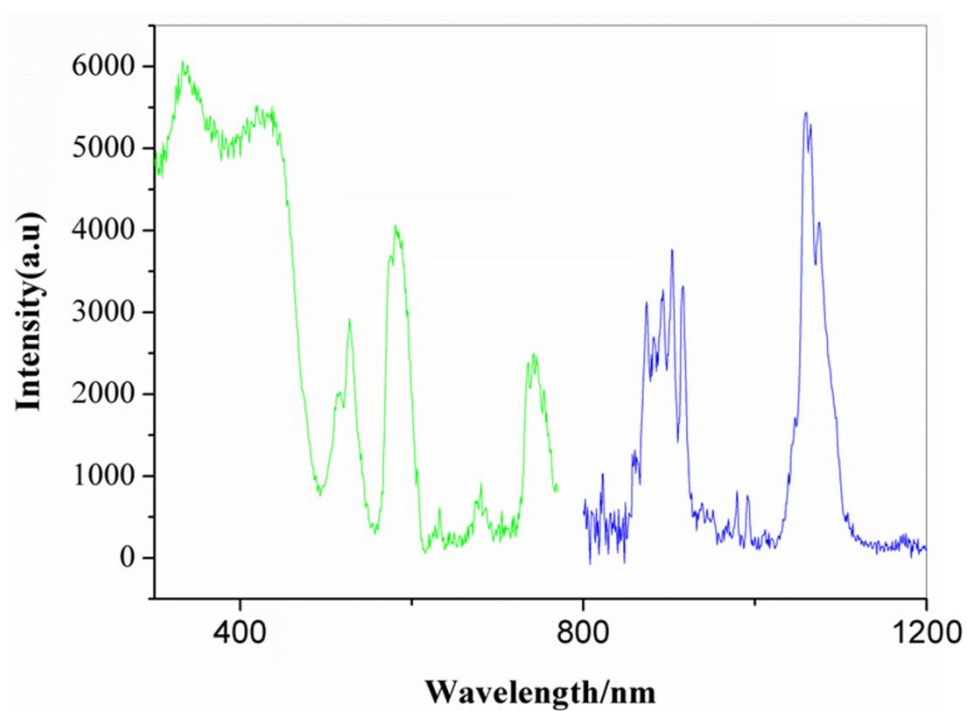

**Figure S24.** (Left) Excitation and (right) emission spectra of **5b** in solid state ( $\lambda_{\text{ex}} = 420 \text{ nm}$ ,  $\lambda_{\text{em}} = 1050 \text{ nm}$ , solid traces).

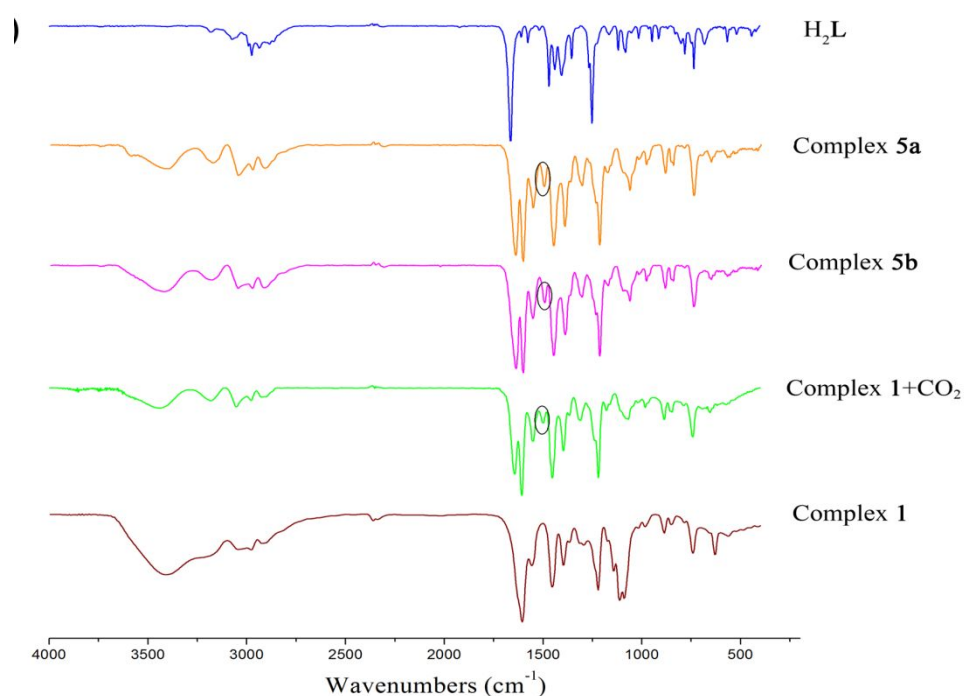

**Figure S25.** IR spectra of ligand  $\text{H}_2\text{L}$  and complexes (**5a**, **5b**, **1**+ $\text{CO}_2$ , and **1**) in the solid state (KBr disk) at room temperature.

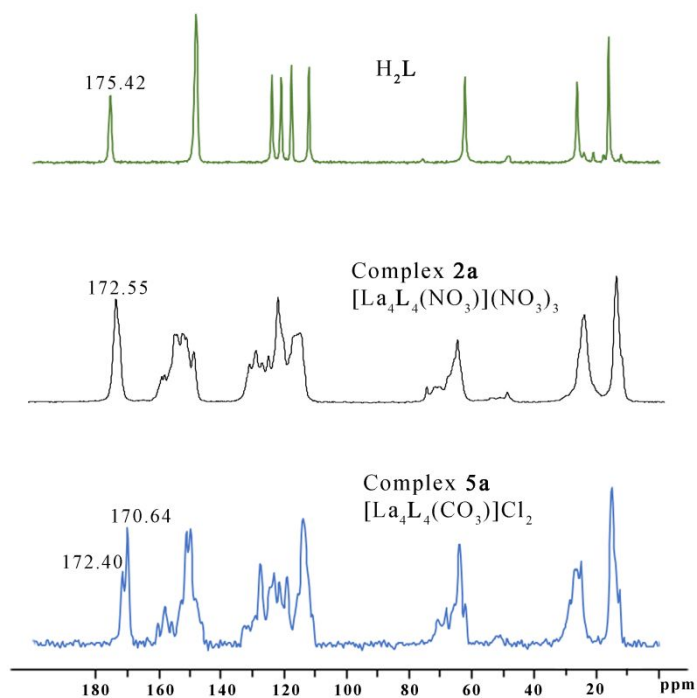

**Figure S26.** The solid-state  $^{13}\text{C}$  NMR spectrum of  $\text{H}_2\text{L}$ , **2a** and **5a**. Complexes **2a** and **5a** are similar structures of tetranuclear quadruple-stranded helicate, but **2a** does not fix carbonate, so we only see one peak at 172.55 ppm. However, **5a** captures carbon dioxide from the air, so we observe a new small peak at 172.40 ppm, it can be assigned to the encapsulated  $\text{CO}_3^{2-}$  anion. Note that the

chemical shifts of carbonyl groups are slightly altered relative to peaks in complex **5a** due to changes of in coordination environments. (600 MHz)

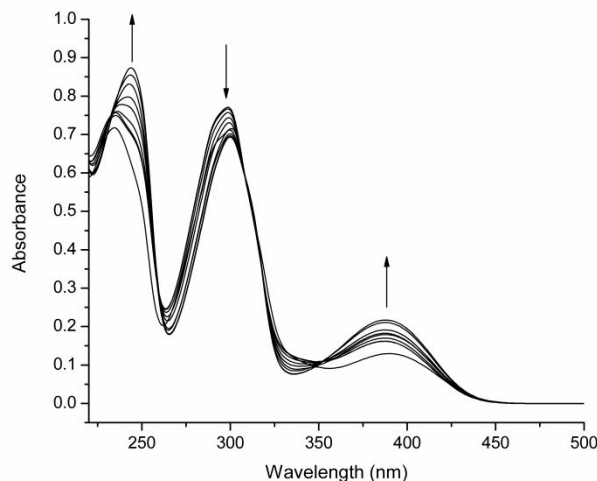

**Figure S27.** UV-Vis spectral changes for the reaction of the system ( $\text{L}^{2-}$  and  $\text{LaCl}_3 \cdot 7\text{H}_2\text{O}$ ) with  $\text{CO}_2$  gas in methanol. Experimental conditions:  $[\text{L}^{2-}] = [\text{LaCl}_3 \cdot 7\text{H}_2\text{O}] = 2.0 \times 10^{-5} \text{ M}$ ,  $T = 25^\circ\text{C}$ .

**Experimental method:** A mixture of  $\text{LiOH} \cdot \text{H}_2\text{O}$  (4.2 mg, 0.1 mmol) and  $\text{H}_2\text{L}$  (22.1 mg, 0.05 mmol) in absolute methanol (3 mL) under a  $\text{N}_2$  atmosphere was stirred to obtain a transparent solution. Then a solution of  $\text{LaCl}_3 \cdot 7\text{H}_2\text{O}$  (0.05 mmol) in absolute methanol (3 mL) was added and the mixture was rapid stirred under a  $\text{N}_2$  atmosphere. The solution system was further diluted to 50 mL with absolute methanol under a  $\text{N}_2$  atmosphere. Then 40  $\mu\text{L}$  the solution was inject into 2 mL absolute methanol and  $\text{CO}_2$  gas was slowly introduced into the solution, which was continuously recorded by UV-vis spectrophotometry.

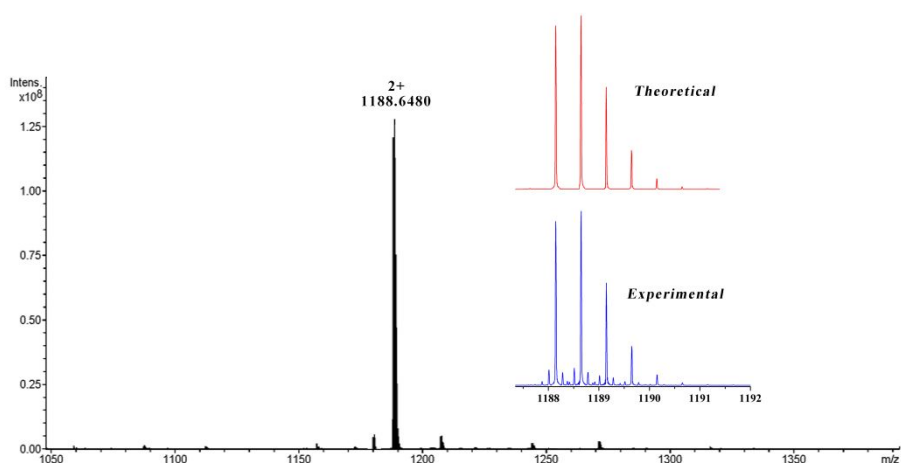

**Figure S28.** HRESI-MS spectrum of  $1 + \text{CO}_2$ . The insert exhibits the measured and simulated isotopic patterns at  $m/z = 1188.6480$ .



**Thermogravimetry spectrum of complexes.**

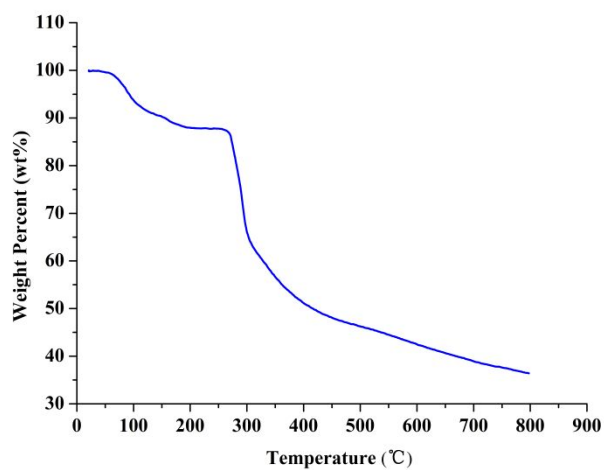

**Figure S29.** Thermogravimetry spectrum of **3**.

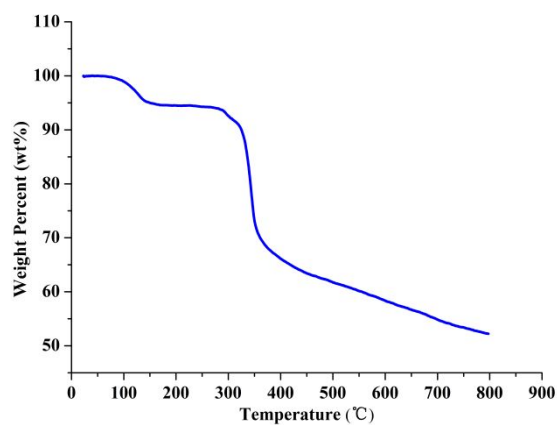

**Figure S30.** Thermogravimetry spectrum of **4a**.

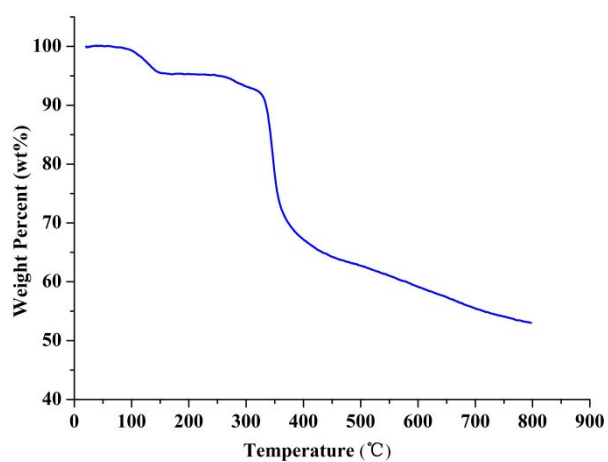

**Figure S31.** Thermogravimetry spectrum of **4b**.

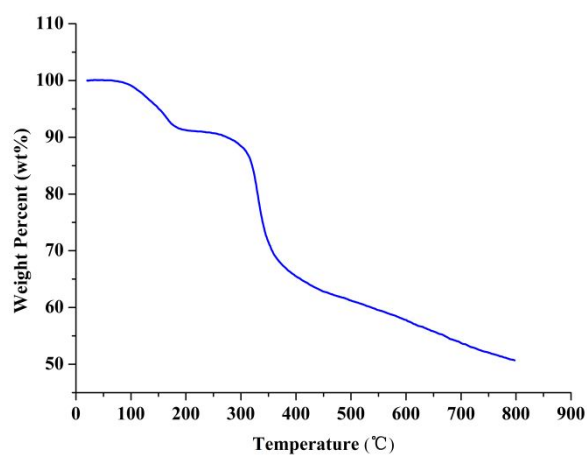

**Figure S32.** Thermogravimetry spectrum of **5a**.

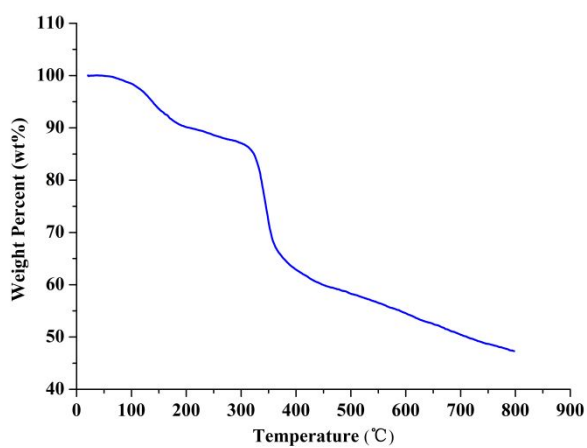

**Figure S33.** Thermogravimetry spectrum of **5b**.

**Table S1:** Room Temperature Luminescence lifetime  $\tau_{\text{obs}}$ , absolute quantum yield  $\Phi$ .

| complex   | $\tau_{\text{obs}}$ [ $\mu\text{s}$ ] | $\Phi$ [%] |
|-----------|---------------------------------------|------------|
| <b>5b</b> | 0.21                                  | 1.43       |

### X-ray crystallography of Compounds

Crystallographic data for complexes were collected with a Agilent Technologies SuperNova diffractometer at low temperature, using graphite-monochromatized Mo K $\alpha$  radiation ( $\lambda = 0.71073$  Å). All non-hydrogen atoms were subjected to anisotropic refinement by full-matrix least-squares methods on  $F^2$  by using the program package SHELXS-97. Hydrogen atoms, except those of the water molecules, were generated geometrically. In the X-ray structure refinements, however, the solvent molecules of complexes could not be located because of their high thermal disorder, and the final structure models were refined without the solvent molecules by using a SQUEEZE routine of PLATON. CCDC 1470814 (**3**), 1817349 (**4a**), 1470815 (**4b**), 1470816 (**5a**), and 1470818 (**5b**) contain the supplementary crystallographic data for this paper.

**Table S2. Crystal data and structure refinement for complex 3.**

| Compound                                  | <b>3</b>                                                                                        |
|-------------------------------------------|-------------------------------------------------------------------------------------------------|
| Empirical formula                         | C <sub>60</sub> H <sub>60</sub> Ce <sub>2</sub> Cl <sub>2</sub> N <sub>12</sub> O <sub>18</sub> |
| Formula weight                            | 1588.34                                                                                         |
| Temperature (K)                           | 296(2)                                                                                          |
| Crystal system                            | triclinic                                                                                       |
| Space group                               | P-1                                                                                             |
| a (Å)                                     | 16.038(12)                                                                                      |
| b (Å)                                     | 16.987(12)                                                                                      |
| c (Å)                                     | 17.256(12)                                                                                      |
| $\alpha$ (°)                              | 95.595(12)                                                                                      |
| $\beta$ (°)                               | 110.384(12)                                                                                     |
| $\gamma$ (°)                              | 115.403(11)                                                                                     |
| Volume (Å <sup>3</sup> )                  | 3808(5)                                                                                         |
| Z                                         | 2                                                                                               |
| $\rho_{\text{calc}}$ (g/cm <sup>3</sup> ) | 1.385                                                                                           |
| $\mu$ (mm <sup>-1</sup> )                 | 1.319                                                                                           |
| F(000)                                    | 1596.0                                                                                          |
| Crystal size (mm)                         | 0.1 × 0.1 × 0.1                                                                                 |
| Radiation                                 | MoK $\alpha$ ( $\lambda = 0.71073$ )                                                            |
| 2 $\theta$ range for data collection/°    | 2.774 to 50.092                                                                                 |
| Index ranges                              | -19 ≤ h ≤ 15, -19 ≤ k ≤ 20, -10 ≤ l ≤ 20                                                        |
| Reflections collected                     | 19161                                                                                           |
| Independent reflections                   | 12997 [R <sub>int</sub> = 0.0691, R <sub>sigma</sub> = 0.1565]                                  |
| Data/restraints/parameters                | 12997/87/854                                                                                    |

|                                             |                                                   |
|---------------------------------------------|---------------------------------------------------|
| Goodness-of-fit on F <sup>2</sup>           | 0.901                                             |
| Final R indexes [I>=2σ (I)]                 | R <sub>1</sub> = 0.0764, wR <sub>2</sub> = 0.1837 |
| Final R indexes [all data]                  | R <sub>1</sub> = 0.1398, wR <sub>2</sub> = 0.2091 |
| Largest diff. peak/hole / e Å <sup>-3</sup> | 2.40/-2.00                                        |

**Table S3. Crystal data and structure refinement for complex 4a and 4b.**

| Compound                                    | 4a                                                                                                             | 4b                                                                                                               |
|---------------------------------------------|----------------------------------------------------------------------------------------------------------------|------------------------------------------------------------------------------------------------------------------|
| Empirical formula                           | C <sub>66</sub> H <sub>76</sub> Br <sub>2</sub> K <sub>2</sub> La <sub>2</sub> N <sub>12</sub> O <sub>20</sub> | C <sub>156</sub> H <sub>200</sub> Cl <sub>4</sub> K <sub>4</sub> N <sub>32</sub> Nd <sub>4</sub> O <sub>44</sub> |
| Formula weight                              | 1873.22                                                                                                        | 4102.63                                                                                                          |
| Temperature (K)                             | 173(2)                                                                                                         | 100(2)                                                                                                           |
| Crystal system                              | monoclinic                                                                                                     | monoclinic                                                                                                       |
| Space group                                 | P2 <sub>1</sub> /c                                                                                             | P2 <sub>1</sub> /c                                                                                               |
| a (Å)                                       | 17.5279(14)                                                                                                    | 20.117(5)                                                                                                        |
| b (Å)                                       | 20.464(2)                                                                                                      | 28.903(8)                                                                                                        |
| c (Å)                                       | 26.141(2)                                                                                                      | 17.785(5)                                                                                                        |
| α (°)                                       | 90                                                                                                             | 90.00                                                                                                            |
| β (°)                                       | 105.074(9)                                                                                                     | 105.810(5)                                                                                                       |
| γ (°)                                       | 90                                                                                                             | 90.00                                                                                                            |
| Volume (Å <sup>3</sup> )                    | 9053.8(14)                                                                                                     | 9950(5)                                                                                                          |
| Z                                           | 4                                                                                                              | 2                                                                                                                |
| ρ <sub>calcd.</sub> (g/cm <sup>3</sup> )    | 1.374                                                                                                          | 1.369                                                                                                            |
| μ (mm <sup>-1</sup> )                       | 1.970                                                                                                          | 1.240                                                                                                            |
| F(000)                                      | 3752.0                                                                                                         | 4192                                                                                                             |
| Crystal size (mm)                           | 0.2 × 0.16 × 0.12                                                                                              | 0.18 × 0.15 × 0.1                                                                                                |
| Radiation                                   | MoKα (λ = 0.710)                                                                                               | MoKα (λ = 0.71073)                                                                                               |
| 2θ range for data collection/°              | 6.75 to 50.198                                                                                                 | 3.84 to 50.02                                                                                                    |
| Index ranges                                | -19 ≤ h ≤ 20, -24 ≤ k ≤ 24, -31 ≤ l ≤ 31                                                                       | -23 ≤ h ≤ 20, -34 ≤ k ≤ 34, -21 ≤ l ≤ 20                                                                         |
| Reflections collected                       | 41576                                                                                                          | 50254                                                                                                            |
| Independent reflections                     | 16131 [R <sub>int</sub> = 0.0659, R <sub>sigma</sub> = 0.0977]                                                 | 17441 [R <sub>int</sub> = 0.0631, R <sub>sigma</sub> = 0.0780]                                                   |
| Data/restraints/parameters                  | 16131/67/953                                                                                                   | 17441/131/1122                                                                                                   |
| Goodness-of-fit on F <sup>2</sup>           | 1.030                                                                                                          | 1.015                                                                                                            |
| Final R indexes [I>=2σ (I)]                 | R <sub>1</sub> = 0.0555, wR <sub>2</sub> = 0.1311                                                              | R <sub>1</sub> = 0.0546, wR <sub>2</sub> = 0.1403                                                                |
| Final R indexes [all data]                  | R <sub>1</sub> = 0.0852, wR <sub>2</sub> = 0.1510                                                              | R <sub>1</sub> = 0.0825, wR <sub>2</sub> = 0.1595                                                                |
| Largest diff. peak/hole / e Å <sup>-3</sup> | 2.31/-1.77                                                                                                     | 2.06/-1.10                                                                                                       |

**Table S4. Selected bond lengths (Å) for complex 4a.**

|         |          |         |          |
|---------|----------|---------|----------|
| La1–O2  | 2.382(4) | La2–O4  | 2.577(4) |
| La1–O3  | 2.537(4) | La2–O5  | 2.386(4) |
| La1–O8  | 2.381(4) | La2–O10 | 2.613(4) |
| La1–O9  | 2.590(4) | La2–O11 | 2.387(4) |
| La1–O14 | 2.466(4) | La2–O16 | 2.597(4) |
| La1–O15 | 2.536(4) | La2–O17 | 2.400(4) |
| La1–N1  | 2.729(5) | La2–N4  | 2.749(5) |
| La1–N5  | 2.808(5) | La2–N8  | 2.787(5) |

|        |            |         |            |
|--------|------------|---------|------------|
| La1–N9 | 2.757(5)   | La2–N12 | 2.753(5)   |
| K1–O1  | 2.787(4)   | K2–O5   | 2.821(4)   |
| K1–O2  | 2.757(4)   | K2–O6   | 2.836(5)   |
| K1–O7  | 3.423(5)   | K2–O11  | 2.768(5)   |
| K1–O8  | 2.696(4)   | K2–O12  | 2.874(6)   |
| K1–O13 | 2.821(5)   | K2–O17  | 2.771(4)   |
| K1–O14 | 2.860(4)   | K2–O18  | 2.842(5)   |
| K1–O19 | 2.735(6)   | K2–O20  | 2.736(6)   |
| La1–K1 | 3.7345(14) | La2–K2  | 3.8027(15) |

**Table S5. Crystal data and structure refinement for complex 5a and 5b.**

| Compound                                    | 5a                                                                                               | 5b                                                                                               |
|---------------------------------------------|--------------------------------------------------------------------------------------------------|--------------------------------------------------------------------------------------------------|
| Empirical formula                           | C <sub>92</sub> H <sub>103</sub> Cl <sub>2</sub> La <sub>4</sub> N <sub>17</sub> O <sub>28</sub> | C <sub>95</sub> H <sub>110</sub> Cl <sub>2</sub> N <sub>18</sub> Nd <sub>4</sub> O <sub>29</sub> |
| Formula weight                              | 2521.45                                                                                          | 2615.86                                                                                          |
| Temperature (K)                             | 173(2)                                                                                           | 296(2)                                                                                           |
| Crystal system                              | triclinic                                                                                        | triclinic                                                                                        |
| Space group                                 | P-1                                                                                              | P-1                                                                                              |
| a (Å)                                       | 16.3322(6)                                                                                       | 16.181(9)                                                                                        |
| b (Å)                                       | 19.7882(7)                                                                                       | 20.107(12)                                                                                       |
| c (Å)                                       | 21.9567(8)                                                                                       | 21.793(12)                                                                                       |
| $\alpha$ (°)                                | 116.344(4)                                                                                       | 115.633(6)                                                                                       |
| $\beta$ (°)                                 | 93.589(3)                                                                                        | 93.383(7)                                                                                        |
| $\gamma$ (°)                                | 106.368(3)                                                                                       | 106.000(7)                                                                                       |
| Volume (Å <sup>3</sup> )                    | 5954.3(4)                                                                                        | 6013(6)                                                                                          |
| Z                                           | 2                                                                                                | 2                                                                                                |
| $\rho_{\text{calc}}$ (g/cm <sup>3</sup> )   | 1.406                                                                                            | 1.445                                                                                            |
| $\mu$ (mm <sup>-1</sup> )                   | 1.522                                                                                            | 1.816                                                                                            |
| F(000)                                      | 2520.0                                                                                           | 2624.0                                                                                           |
| Crystal size (mm)                           | 0.2 × 0.2 × 0.1                                                                                  | 0.2 × 0.2 × 0.1                                                                                  |
| Radiation                                   | MoK $\alpha$ ( $\lambda$ = 0.710)                                                                | MoK $\alpha$ ( $\lambda$ = 0.71073)                                                              |
| 2 $\theta$ range for data collection/°      | 6.566 to 57.688                                                                                  | 3.052 to 55.492                                                                                  |
| Index ranges                                | -21 ≤ h ≤ 21, -26 ≤ k ≤ 26, -27 ≤ l ≤ 27                                                         | -21 ≤ h ≤ 21, -26 ≤ k ≤ 26, -28 ≤ l ≤ 28                                                         |
| Reflections collected                       | 51497                                                                                            | 57536                                                                                            |
| Independent reflections                     | 27255 [R <sub>int</sub> = 0.0374, R <sub>sigma</sub> = 0.0712]                                   | 27527 [R <sub>int</sub> = 0.0727, R <sub>sigma</sub> = 0.1266]                                   |
| Data/restraints/parameters                  | 27255/93/1298                                                                                    | 27527/385/1353                                                                                   |
| Goodness-of-fit on F <sup>2</sup>           | 1.019                                                                                            | 1.051                                                                                            |
| Final R indexes [I ≥ 2 $\sigma$ (I)]        | R <sub>1</sub> = 0.0519, wR <sub>2</sub> = 0.1222                                                | R <sub>1</sub> = 0.1263, wR <sub>2</sub> = 0.3463                                                |
| Final R indexes [all data]                  | R <sub>1</sub> = 0.0773, wR <sub>2</sub> = 0.1403                                                | R <sub>1</sub> = 0.1813, wR <sub>2</sub> = 0.3807                                                |
| Largest diff. peak/hole / e Å <sup>-3</sup> | 4.35/-2.07                                                                                       | 4.62/-2.58                                                                                       |

**Table S6. Selected bond lengths (Å) and angles (°) for complex 5a.**

|         |          |         |          |
|---------|----------|---------|----------|
| La1–O8  | 2.319(3) | La2–O2  | 2.311(3) |
| La1–O20 | 2.425(3) | La2–O14 | 2.423(3) |
| La1–O14 | 2.511(3) | La2–O3  | 2.515(3) |

|                    |           |                    |          |
|--------------------|-----------|--------------------|----------|
| La1–O9             | 2.524(3)  | La2–O15            | 2.561(4) |
| La1–O21            | 2.534(3)  | La2–O20            | 2.562(3) |
| La1–O30            | 2.559(4)  | La2–O30            | 2.663(4) |
| La1–N5             | 2.715(4)  | La2–N9             | 2.710(4) |
| La1–N13            | 2.761(4)  | La2–N1             | 2.734(4) |
| La1–O13            | 2.796(3)  | La2–O28            | 2.772(6) |
| La3–O23            | 2.332(3)  | La4–O17            | 2.349(4) |
| La3–O11            | 2.418(3)  | La4–O5             | 2.433(3) |
| La3–O22            | 2.508(3)  | La4–O16            | 2.506(3) |
| La3–O10            | 2.515(3)  | La4–O4             | 2.507(4) |
| La3–O29            | 2.552(3)  | La4–O11            | 2.555(3) |
| La3–O5             | 2.562(3)  | La4–O29            | 2.675(4) |
| La3–O6             | 2.720(3)  | La4–N4             | 2.712(4) |
| La3–N8             | 2.736(4)  | La4–N12            | 2.779(4) |
| La3–N16            | 2.745(4)  | La4–O28            | 2.804(7) |
|                    |           | La4–O12            | 2.817(3) |
| O(28)–C(100)       | 1.518(10) | O(29)–C(100)       | 1.144(7) |
| O(30)–C(100)       | 1.124(7)  |                    |          |
| O(30)–C(100)–O(29) | 156.2(11) | O(30)–C(100)–O(28) | 100.3(7) |
| O(29)–C(100)–O(28) | 103.4(7)  |                    |          |
